# Supplementary material for: Measurement invariance of the Nine-Item Internet Gaming Disorder Scale (IGDS9-SF) Across Siri Lanka, Turkey, Australia, and the USA
Source: Preprints.org preprint supplement (doi:10.20944/preprints202202.0055.v1), 2022-02-03
Supplement: Supplementary file 3 [file supplementary]

**Supplementary Table 1.** Invariance of the IGD-SF9 across different groups among university students from Sri Lanka

| **Groups** | **Invariance levels** | **χ2** | **df** | ***P*** | **Δχ2** | **Δdf** | ***p*(Δχ2)** | **CFI** | **ΔCFI** | **TLI** | **ΔTLI** | **RMSEA** | **ΔRMSEA** | **SRMR** |
| --- | --- | --- | --- | --- | --- | --- | --- | --- | --- | --- | --- | --- | --- | --- |
| Gender | Configural  Metric  Strong  Strict | 76.766  83.651  85.846  120.844 | 54  62  63  72 | 0.023  0.035  0.029  0.000 | 6.885  2.195  34.997 | 8  1  9 | 0.549  0.138  0.001 | 0.963  0.965  0.963  0.921 | -0.002  0.002  **0.042** | 0.951  0.959  0.958  0.921 | -0.008  0.001  **0.037** | 0.036  0.033  0.034  0.046 | 0.003  -0.001  -0.012 | 0.0390  0.0463  0.0571  0.0464 |
| Ethnicity | Configural  Metric  Strong  Strict | 84.134  90.936  92.457  98.823 | 54  62  63  72 | 0.005  0.010  0.009  0.020 | 6.802  1.522  6.365 | 8  1  9 | 0.558  0.217  0.703 | 0.954  0.956  0.955  0.959 | -0.002  0.001  -0.004 | 0.939  0.949  0.949  0.959 | 0.010  0.000  0.010 | 0.042  0.038  0.038  0.034 | 0.004  0.000  0.004 | 0.0430  0.0436  0.0447  0.0453 |
| Language of the questionnaire | Configural  Metric  Strong  Strict | 83.561  86.519  91.431  101.047 | 54  62  63  72 | 0.006  0.022  0.011  0.014 | 2.959  4.912  9.616 | 8  1  9 | 0.937  0.027  0.382 | 0.956  0.964  0.958  0.957 | -0.008  0.006  0.001 | 0.942  0.958  0.952  0.957 | -0.016  0.006  -0.005 | 0.041  0.035  0.038  0.036 | 0.006  -0.003  0.002 | 0.0520  0.0529  0.0661  0.0685 |
| Academic major | Configural  Metric  Strong  Strict | 181.809  197.609  200.649  230.161 | 144  152  153  162 | 0.018  0.008  0.006  0.000 | 15.800  3.039  29.512 | 8  1  9 | 0.045  0.081  0.001 | 0.945  0.934  0.931  0.901 | 0.011  0.003  0.030 | 0.945  0.937  0.935  0.912 | 0.008  0.002  0.023 | 0.029  0.031  0.032  0.037 | -0.003  -0.001  -0.005 | 0.0846  0.0920  0.0987  0.1035 |
| Income | Configural  Metric  Strong  Strict | 124.237  147.471  147.546  168.628 | 99  107  108  117 | 0.044  0.006  0.007  0.001 | 23.234  0.075  21.082 | 8  1  9 | 0.003  0.785  0.012 | 0.963  0.941  0.942  0.925 | **0.022**  -0.001  0.017 | 0.960  0.940  0.942  0.930 | **0.020**  -0.002  0.012 | 0.028  0.034  0.034  0.037 | 0.008  -0.004  -0.003 | 0.0680  0.0843  0.0862  0.0741 |
| Device | Configural  Metric  Strong  Strict | 65.723  76.295  76.567  83.104 | 54  62  63  72 | 0.132  0.105  0.117  0.174 | 10.572  0.272  6.537 | 8  1  9 | 0.227  0.602  0.685 | 0.982  0.978  0.980  0.983 | 0.004  -0.002  -0.003 | 0.976  0.975  0.977  0.983 | 0.001  -0.002  -0.006 | 0.026  0.027  0.026  0.022 | -0.001  0.001  0.004 | 0.0392  0.0430  0.0430  0.0448 |
| Game type | Configural  Metric  Strong  Strict | 150.916  158.040  158.178  186.206 | 99  107  108  117 | 0.001  0.001  0.001  0.000 | 7.124  0.138  28.028 | 8  1  9 | 0.523  0.710  0.001 | 0.923  0.925  0.926  0.898 | -0.002  -0.001  **0.028** | 0.916  0.924  0.926  0.906 | -0.008  -0.002  **0.020** | 0.041  0.039  0.038  0.043 | 0.002  0.001  -0.005 | 0.0782  0.0862  0.0860  **0.0931** |

χ2, chi-square; df, degrees of freedom; CFI, comparative fit index; TLI, Tucker–Lewis index; RMSEA, root mean square error of approximation; CI, confidence interval; SRMR, standardized root mean residual.
